# Supplementary material
Source: publisher site journal article supplement (https://www.spandidos-publications.com/3464/downloadSupplementary)

Figure S1. Representative X-ray images of patients with osteoporosis and healthy subjects.

Healthy

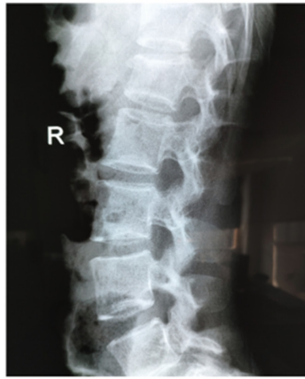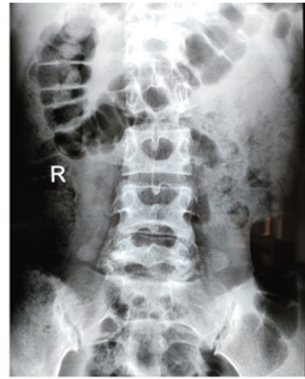

Osteoporosis

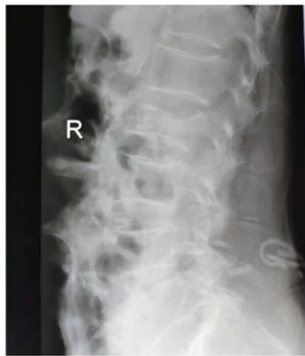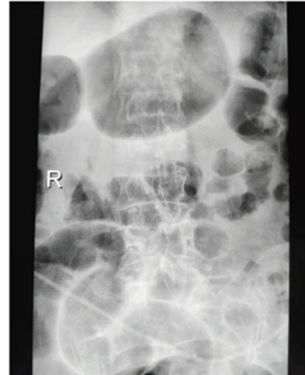

Figure S2. Transfection efficiency of the pcDNA-VEGFA overexpression vector. \*\*P<0.01. VEGFA, vascular endothelial growth factor A.

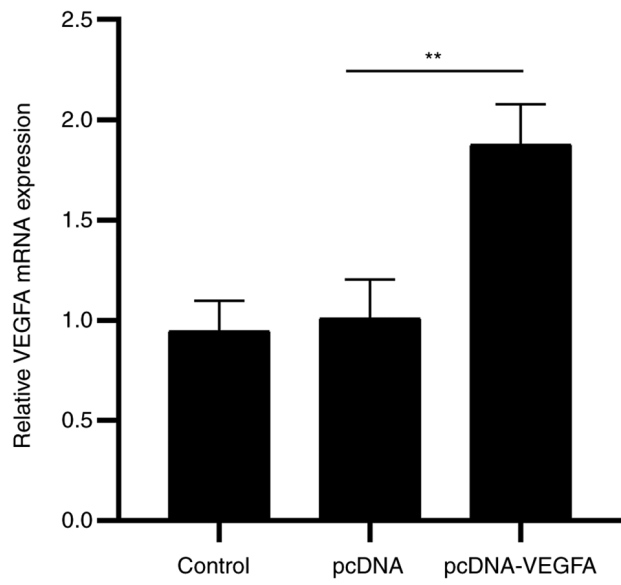

Supplement: Supplementary file 1 [file downloadSupplementary]
